# Supplementary material for: Real-time, multidimensional in vivo imaging used to investigate blood flow in mouse pancreatic islets
Source: JCI journal article supplement (doi:10.1172/jci36209), 2008-10-09
Supplement: sd1 [file 1]

## **Nyman Supplemental Movies 1-4**

Please see videos attached

### **Supplemental movie 1**

Real-time 3-D (through-focus) filling pattern of the vascular tree after a bolus injection of rhodamine dextran

### **Supplemental movie 2**

Single-plane time-series (black and white version) of same islet showing efferent flow in the large vessel captured in real-time

### **Supplemental movie 3**

Real-time 3-D (through-focus) perfusion of rhodamine dextran in islet with “inner to outer” filling pattern

### **Supplemental movie 4**

Through-focus projection time series showing real-time version of islet with “top to bottom” filling pattern

## Nyman Supplemental Figure 1

A.

Through-focus projections time series demonstrating "inner to outer" flow

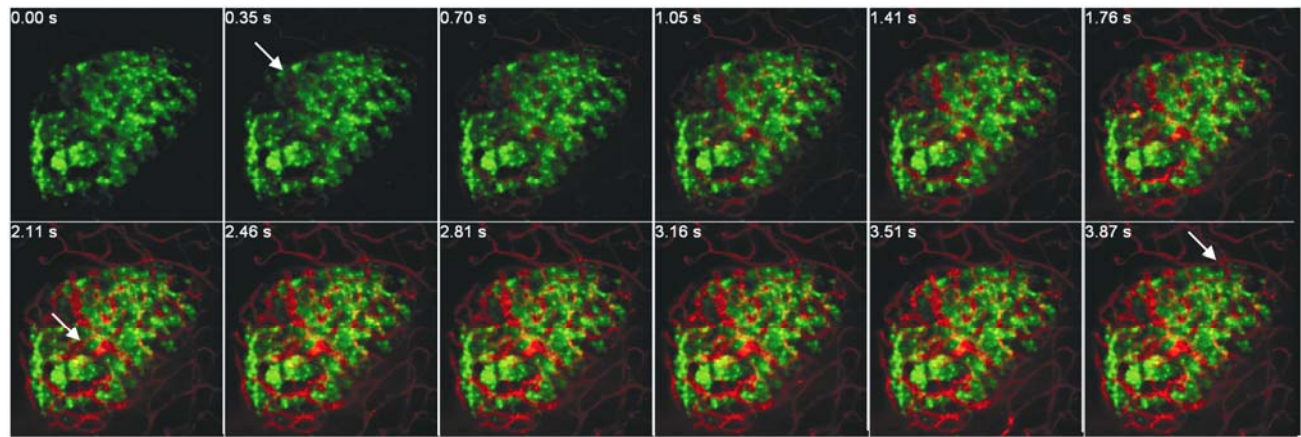

B.

Through-focus projection time series demonstrating "top to bottom" flow

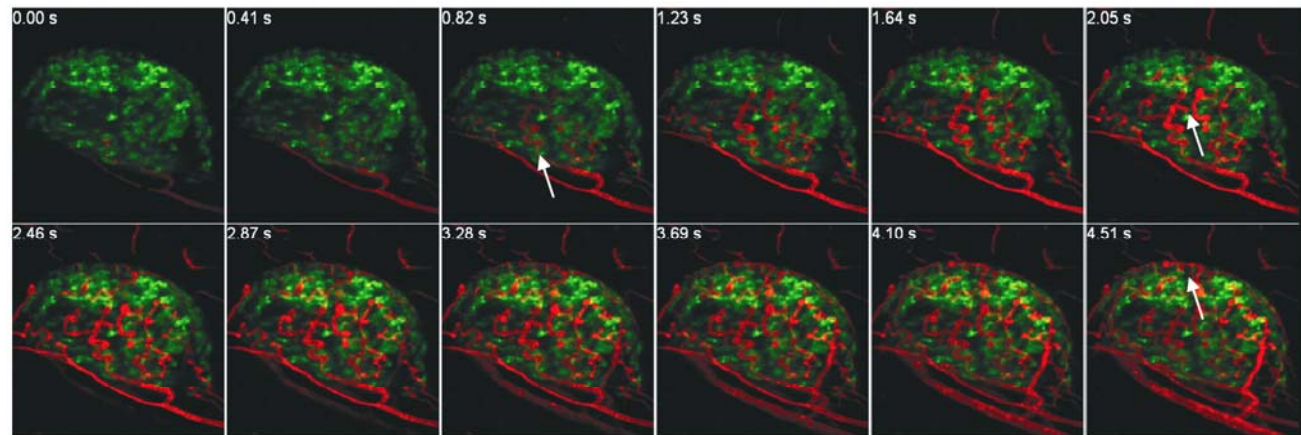

## Supplemental figure 1

(A) Still version of through-focus projection time series showing islet with "inner to outer" filling pattern and (B) an islet with "top to bottom" filling pattern.
